# Supplementary material for: The GET pathway serves to activate Atg32-mediated mitophagy by ER targeting of the Ppg1-Far complex
Source: Life Sci Alliance. 2023 Jan 25;6(4):e202201640. doi: 10.26508/lsa.202201640 (PMC9880027; doi:10.26508/lsa.202201640)
Supplement: Supplementary file 5 [file LSA-2022-01640_SdataF2.1.xlsx]

## Sheet: Fig2A_N1-3
		WT	ppg1-null	get1-null	get1/ppg1-null	get2-null	get2/ppg1-null	negative control
	Lumi/GFP N1	0.123117	0.238619	0.02118	0.131132	0.0312796	0.0971986	0.0017452
	Lumi/GFP N2	0.13974	0.328664	0.02118	0.161792	0.0303318	0.102292	0.0034904
	Lumi/GFP N3	0.110649	0.357679	0.0277358	0.198113	0.0341232	0.175297	0.00038918
	Average	0.124502	0.308321	0.0233653	0.163679	0.0319115	0.124929	0.00187493
	Avedev	0.0101587	0.0464677	0.00291365	0.022956	0.00147446	0.0335786	0.00107698
	Ctrl normalized
	Lumi/GFP N1	1	1.93815	0.172032	1.0651	0.254064	0.789483	0.0141752
	Lumi/GFP N2	1	2.35197	0.151567	1.15781	0.217058	0.732015	0.0249778
	Lumi/GFP N3	1	3.23254	0.250664	1.79046	0.308391	1.58426	0.00351723

## Sheet: Fig2A_t-test
	Table Analyzed	Fig2A_NanoBiT
	Column B	WT	get1-null	get2-null
	vs.	vs.	vs.	vs.
	Column A	ppg1-null	get1/ppg1-null	get2/ppg1-null
	Unpaired t test
	P value	0.0168	0.0076	0.0485
	P value summary	*	**	*
	Significantly different (P < 0.05)?	Yes	Yes	Yes
	One- or two-tailed P value?	Two-tailed	Two-tailed	Two-tailed
	t, df	t=3.950, df=4	t=4.986, df=4	t=2.807, df=4
	How big is the difference?
	Mean of column A	1	0.1914	0.2598
	Mean of column B	2.508	1.338	1.035
	Difference between means (B - A) ± SEM	1.508 ± 0.3817	1.146 ± 0.2299	0.7754 ± 0.2763
	95% confidence interval	0.4479 to 2.567	0.5081 to 1.785	0.008338 to 1.542
	R squared (eta squared)	0.7959	0.8614	0.6632
	F test to compare variances
	F, DFn, Dfd	Infinity, 2, 2	56.94, 2, 2	107.5, 2, 2
	P value	<0.0001	0.0345	0.0184
	P value summary	****	*	*
	Significantly different (P < 0.05)?	Yes	Yes	Yes
	Data analyzed
	Sample size, column A	3	3	3
	Sample size, column B	3	3	3

## Sheet: Fig2C_N1-3
		N1	N2	N3	Average			Gly 72 h	N1	N2	N3
	WT 24h	1.92994	1.08695	1.15007	1.38899			WT 72h	100	100	100
	WT 72h	100	100	100	100			ppg1-null 72h	138.426	143.375	130.494
	ppg1-null 24h	18.931	13.919	14.9064	15.9188			get1-null 72h	19.1489	10.1096	10.3677
	ppg1-null 72h	138.426	143.375	130.494	137.431			get1/ppg1-null 72h	115.845	114.561	104.153
	get1-null 24h	1.94696	0.452339	1.15761	1.18564			get2-null 72h	44.1835	33.5281	32.4454
	get1-null 72h	19.1489	10.1096	10.3677	13.2087			get2/ppg1-null 72h	103.133	86.5604	78.1479
	get1/ppg1-null 24h	2.5474	1.21604	2.13495	1.96613			atg32-null	2.19031	0.292564	1.82902
	get1/ppg1-null 72h	115.845	114.561	104.153	111.52
	get2-null 24h	1.61292	0.757936	1.76212	1.37766
	get2-null 72h	44.1835	33.5281	32.4454	36.719
	get2/ppg1-null 24h	1.37138	0.523573	1.20116	1.03204
	get2/ppg1-null 72h	103.133	86.5604	78.1479	89.2805
	atg32-null	0.710053	0.0245485	0.862723	0.532441
	atg32-null	2.19031	0.292564	1.82902	1.4373

## Sheet: Fig2C_t-test
	Table Analyzed	Fig2C_mitophagy
	Column B	WT	get1-null	get2-null
	vs.	vs.	vs.	vs.
	Column A	ppg1-null	get1/ppg1-null	get2/ppg1-null
	Unpaired t test
	P value	0.0006	<0.0001	0.0031
	P value summary	***	****	**
	Significantly different (P < 0.05)?	Yes	Yes	Yes
	One- or two-tailed P value?	Two-tailed	Two-tailed	Two-tailed
	t, df	t=9.978, df=4	t=20.71, df=4	t=6.379, df=4
	How big is the difference?
	Mean of column A	100	13.21	36.72
	Mean of column B	137.4	111.5	89.28
	Difference between means (B - A) ± SEM	37.43 ± 3.752	98.31 ± 4.747	52.56 ± 8.240
	95% confidence interval	27.02 to 47.85	85.13 to 111.5	29.68 to 75.44
	R squared (eta squared)	0.9614	0.9908	0.9105
	F test to compare variances
	F, DFn, Dfd	Infinity, 2, 2	1.552, 2, 2	3.840, 2, 2
	P value	<0.0001	0.7836	0.4132
	P value summary	****	ns	ns
	Significantly different (P < 0.05)?	Yes	No	No
	Data analyzed
	Sample size, column A	3	3	3
	Sample size, column B	3	3	3

## Sheet: Fig2D_N1-3
	Lumi/GFP	N1	N2	N3	Avegrage
	WT	0.0763359	0.0898405	0.0575885	0.0745883
	d151-200	1.36142	1.41707	1.00277	1.26042
	get1 null	0.0149083	0.0147783	0.0146262	0.0147709
	get1 null d151-200	0.123956	0.102382	0.0626718	0.0963369
	NC	0.00380952	0.00327154	0	0.00236035
	Ctrl_normalized
	Lumi/GFP	N1	N2	N3
	WT	1	1	1
	d151-200	17.8346	15.7732	17.4127
	get1 null	0.195298	0.164495	0.253978
	get1 null d151-200	1.62383	1.1396	1.08827
	NC	0.0499048	0.036415	0

## Sheet: Fig2D_t-test
	Table Analyzed	Fig2E_NanoBiT
	Column B	WT	get1-null
	vs.	vs.	vs.
	Column A	d151-200	get1-null, d151-200
	Unpaired t test
	P value	0.0008	0.0105
	P value summary	***	*
	Significantly different (P < 0.05)?	Yes	Yes
	One- or two-tailed P value?	Two-tailed	Two-tailed
	t, df	t=9.111, df=4	t=4.545, df=4
	How big is the difference?
	Mean of column A	0.07459	0.01477
	Mean of column B	1.26	0.09634
	Difference between means (B - A) ± SEM	1.186 ± 0.1302	0.08157 ± 0.01795
	95% confidence interval	0.8245 to 1.547	0.03173 to 0.1314
	R squared (eta squared)	0.954	0.8378
	F test to compare variances
	F, DFn, Dfd	192.7, 2, 2	48493, 2, 2
	P value	0.0103	<0.0001
	P value summary	*	****
	Significantly different (P < 0.05)?	Yes	Yes
	Data analyzed
	Sample size, column A	3	3
	Sample size, column B	3	3

## Sheet: Fig2F_N1-4
		N1	N2	N3	N4	Average
	WT SDG24	2.42946	7.21469	0	2.9541	3.14956
	WT SDG72	100	100	100	100	100
	d151-200 SDG24	8.42974	13.6377	7.31997	33.3749	15.6906
	d151-200 SDG72	133.477	139.089	132.713	162.882	142.04
	get1-null SDG24	1.63135	7.56148	0.595548	0.207606	2.499
	get1-null SDG72	23.6646	36.7108	31.0733	29.005	30.1134
	get1-null, d151-200 SDG24	1.38459	6.33454	5.11164	1.27656	3.52683
	get1-null, d151-200 SDG24	75.1548	87.7393	77.9936	83.0039	80.9729
	get2-null SDG24	0.725877	4.40874	0.257834	1.26722	1.66492
	get2-null SDG72	15.4599	29.9487	16.7354	26.6775	22.2054
	get2-null, d151-200 SDG24	0	4.50841	4.65319	1.88991	2.76288
	get2-null, d151-200 SDG24	74.3545	91.0296	98.0491	108.505	92.9845
	atg32-null SDG24h	0	4.04196	0	0	1.01049
	atg32-null SDG72h	0	0	0	0	0

## Sheet: Fig2F_t-test
	Table Analyzed	Fig2F_mitophagy
	Column B	WT	get1-null	get2-null
	vs.	vs.	vs.	vs.
	Column A	d151-200	get1-null, d151-200	get2-null, d151-200
	Unpaired t test
	P value	0.001	<0.0001	0.0001
	P value summary	**	****	***
	Significantly different (P < 0.05)?	Yes	Yes	Yes
	One- or two-tailed P value?	Two-tailed	Two-tailed	Two-tailed
	t, df	t=5.928, df=6	t=13.14, df=6	t=8.820, df=6
	How big is the difference?
	Mean of column A	100	30.11	22.21
	Mean of column B	142	80.97	92.98
	Difference between means (B - A) ± SEM	42.04 ± 7.091	50.86 ± 3.872	70.78 ± 8.025
	95% confidence interval	24.69 to 59.39	41.39 to 60.33	51.14 to 90.42
	R squared (eta squared)	0.8542	0.9664	0.9284
	F test to compare variances
	F, DFn, Dfd	Infinity, 3, 3	1.062, 3, 3	3.974, 3, 3
	P value	<0.0001	0.962	0.2869
	P value summary	****	ns	ns
	Significantly different (P < 0.05)?	Yes	No	No
	Data analyzed
	Sample size, column A	4	4	4
	Sample size, column B	4	4	4
