# Supplementary material for: The GET pathway serves to activate Atg32-mediated mitophagy by ER targeting of the Ppg1-Far complex
Source: Life Sci Alliance. 2023 Jan 25;6(4):e202201640. doi: 10.26508/lsa.202201640 (PMC9880027; doi:10.26508/lsa.202201640)
Supplement: Supplementary file 10 [file LSA-2022-01640_SdataFS2.2.xlsx]

## Sheet: FigS2A_N1-3
	20200107 mitoDHFRmCherry Far8-3GFP get1 get2 get3 null SDG24hr N1
		Sample	Cell number (>100)	Cells with Far8-3xGFP on mitochondria ()	%		N1	N2	N3	Average
	KOY7805 WT	Overlay_Image_CH1_2 merged	140	15	10.7143		10.7143	13.0435	8.10811	10.622
	KOY7807 get1-null	Overlay_Image_CH1_2 merged	123	107	86.9919		86.9919	81.9355	95.6897	88.2057
	KOY7809 get2-null		114	108	94.7368		94.7368	96.5278	97.5207	96.2618
	KOY8235 get3-null		109	99	90.8257		90.8257	90.8397	93.0818	91.5824
	20200107 mitoDHFRmCherry Far8-3GFP get1 get2 get3 null SDG24hr N2	Sample	Cell number (>100)	Cells with Far8-3xGFP on mitochondria ()	%
	KOY7805 WT		115	15	13.0435
	KOY7807 get1-null		155	127	81.9355
	KOY7809 get2-null		144	139	96.5278
	KOY8235 get3-null		131	119	90.8397
	20200107 mitoDHFRmCherry Far8-3GFP get1 get2 get3 null SDG24hr N3	Sample	Cell number (>100)	Cells with Far8-3xGFP on mitochondria ()	%
	KOY7805 WT		111	9	8.10811
	KOY7807 get1-null		116	111	95.6897
	KOY7809 get2-null		121	118	97.5207
	KOY8235 get3-null		159	148	93.0818

## Sheet: FigS2D_N1-3
	20201230 TEFpmitoDHFRmCherry Far8 3GFP get1 get2 GET1 NR GET2 RERR SDG24h N1
		Cell number (>100)	Cells with Far8-3xGFP on ER	%		N1-3 Average
	KOY8077_SDG24_1 TEFpmitoDHFRmCherry Far8 3GFP	516	39	7.55814		7.655
	KOY8079_SDG24_1 TEFpmitoDHFRmCherry Far8 3GFP, get1	197	190	96.4467		95.873
	KOY7862_SDG24_1 TEFpmitoDHFRmCherry Far8 3GFP, GET1 WT	228	21	9.21053		7.21553
	KOY7864_SDG24_1 TEFpmitoDHFRmCherry Far8 3GFP, GET1 EREE	344	319	92.7326		94.7309
	KOY8081_SDG24_1 TEFpmitoDHFRmCherry Far8 3GFP, get2	327	317	96.9419		97.7423
	KOY7866_SDG24_1 TEFpmitoDHFRmCherry Far8 3GFP, GET2 WT	167	14	8.38323		10.7247
	KOY7884_SDG24_1 TEFpmitoDHFRmCherry Far8 3GFP, GET2 EREE	199	197	98.995		98.1881
	20201231 TEFpmitoDHFRmCherry Far8 3GFP get1 get2 GET1 NR GET2 RERR SDG24h N2
		Cell number (>100)	Cells with Far8-3xGFP on ER	%
	KOY8077_SDG24_1 TEFpmitoDHFRmCherry Far8 3GFP	313	23	7.34824
	KOY8079_SDG24_1 TEFpmitoDHFRmCherry Far8 3GFP, get1	236	225	95.339
	KOY7862_SDG24_1 TEFpmitoDHFRmCherry Far8 3GFP, GET1 WT	200	13	6.5
	KOY7864_SDG24_1 TEFpmitoDHFRmCherry Far8 3GFP, GET1 EREE	340	323	95
	KOY8081_SDG24_1 TEFpmitoDHFRmCherry Far8 3GFP, get2	266	258	96.9925
	KOY7866_SDG24_1 TEFpmitoDHFRmCherry Far8 3GFP, GET2 WT	209	24	11.4833
	KOY7884_SDG24_1 TEFpmitoDHFRmCherry Far8 3GFP, GET2 EREE	149	148	99.3289
	20201231 TEFpmitoDHFRmCherry Far8 3GFP get1 get2 GET1 NR GET2 RERR SDG24h N3
		Cell number (>100)	Cells with Far8-3xGFP on ER	%
	KOY8077_SDG24_1 TEFpmitoDHFRmCherry Far8 3GFP	273	22	8.05861
	KOY8079_SDG24_1 TEFpmitoDHFRmCherry Far8 3GFP, get1	240	230	95.8333
	KOY7862_SDG24_1 TEFpmitoDHFRmCherry Far8 3GFP, GET1 WT	219	13	5.93607
	KOY7864_SDG24_1 TEFpmitoDHFRmCherry Far8 3GFP, GET1 EREE	226	218	96.4602
	KOY8081_SDG24_1 TEFpmitoDHFRmCherry Far8 3GFP, get2	424	421	99.2925
	KOY7866_SDG24_1 TEFpmitoDHFRmCherry Far8 3GFP, GET2 WT	195	24	12.3077
	KOY7884_SDG24_1 TEFpmitoDHFRmCherry Far8 3GFP, GET2 EREE	133	128	96.2406

## Sheet: FigS2F_N1-3
Gly 72 h		N1	N2	N3	Average
	WT	100	100	100	100
	get1-null	31.6821	26.9221	20.3938	26.3326
	GET1 NRm	67.1035	73.1314	75.1776	71.8042
	get2-null	39.8257	38.2618	37.9297	38.6724
	GET2 RERRm	72.9576	66.9514	76.2168	72.0419
	atg32-null	0.746873	0	0	0.248958

## Sheet: FigS2F_one-way ANOVA
	Table Analyzed	FigS2F_mitophagy
	Data sets analyzed	A-E
	ANOVA summary
	F	177.9
	P value	<0.0001
	P value summary	****
	Significant diff. among means (P < 0.05)?	Yes
	R squared	0.9861
	Brown-Forsythe test
	F (DFn, DFd)	1.307 (4, 10)
	P value	0.3318
	P value summary	ns
	Are SDs significantly different (P < 0.05)?	No
	Bartlett's test
	Bartlett's statistic (corrected)
	P value
	P value summary
	Are SDs significantly different (P < 0.05)?
	ANOVA table	SS	DF	MS	F (DFn, DFd)	P value
	Treatment (between columns)	10371	4	2593	F (4, 10) = 177.9	P<0.0001
	Residual (within columns)	145.7	10	14.57
	Total	10517	14
	Data summary
	Number of treatments (columns)	5
	Number of values (total)	15

## Sheet: FigS2F_Dunnett
	Number of families	1
	Number of comparisons per family	4
	Alpha	0.05
	Dunnett's multiple comparisons test	Mean Diff.	95.00% CI of diff.	Below threshold?	Summary	Adjusted P Value	A-?
	WT vs. get1-null	73.67	64.66 to 82.68	Yes	****	<0.0001	B	Column B
	WT vs. GET1 NRm	28.2	19.19 to 37.20	Yes	****	<0.0001	C	Column C
	WT vs. get2-null	61.33	52.32 to 70.34	Yes	****	<0.0001	D	Column D
	WT vs. GET2 RERRm	27.96	18.95 to 36.97	Yes	****	<0.0001	E	Column E
	Test details	Mean 1	Mean 2	Mean Diff.	SE of diff.	n1	n2	q	DF
	Column A vs. Column B	100	26.33	73.67	3.117	3	3	23.64	10
	Column A vs. Column C	100	71.8	28.2	3.117	3	3	9.047	10
	Column A vs. Column D	100	38.67	61.33	3.117	3	3	19.68	10
	Column A vs. Column E	100	72.04	27.96	3.117	3	3	8.971	10
