# Supplementary material for: The GET pathway serves to activate Atg32-mediated mitophagy by ER targeting of the Ppg1-Far complex
Source: Life Sci Alliance. 2023 Jan 25;6(4):e202201640. doi: 10.26508/lsa.202201640 (PMC9880027; doi:10.26508/lsa.202201640)
Supplement: Supplementary file 12 [file LSA-2022-01640_SdataFS3.2.xlsx]

## Sheet: FigS3B_N1-3
	20200527TEFp mitoDHFRmCherry Far8 3GFP get1 get2 far9 far10 SDG24 N1
		Cell number (>100)	Cells with Far8-3xGFP on mitochondria ()	%
	KOY7805 WT	108	11	10.1852			KOY7805 WT	10.1852	6.52174	6.25
	KOY7807 get1-null	95	80	84.2105			KOY8051 far9-null	1.23457	0	0
	KOY7809 get2-null	154	143	92.8571			KOY8036 far10-null	4.06504	1.93237	2.46914
	KOY8036 far10-null	123	5	4.06504			KOY7807 get1-null	84.2105	93.3649	89.2857
	KOY8039 get1/far10-null	112	9	8.03571			KOY8054 get1/far9-null	4.34783	0	0
	KOY8042 get2/far10-null	139	10	7.19424			KOY8039 get1/far10-null	8.03571	3.61446	10.0775
	KOY8051 far9-null	81	1	1.23457			KOY7809 get2-null	92.8571	88.6486	95.0704
	KOY8054 get1/far9-null	115	5	4.34783			KOY8057 get2/far9-null	0	1.80723	0
	KOY8057 get2/far9-null	185	0	0			KOY8042 get2/far10-null	7.19424	1.67598	2.39521
			[
	20210621 TEFp mitoDHFRmCherry Far8 3GFP get1 get2 far9 far10 SDG24 N2
		Cell number (>100)	Cells with Far8-3xGFP on mitochondria ()	%
	KOY7805 WT	230	15	6.52174
	KOY7807 get1-null	211	197	93.3649
	KOY7809 get2-null	185	164	88.6486
	KOY8036 far10-null	207	4	1.93237
	KOY8039 get1/far10-null	166	6	3.61446
	KOY8042 get2/far10-null	179	3	1.67598
	KOY8051 far9-null	140	0	0
	KOY8054 get1/far9-null	178	0	0
	KOY8057 get2/far9-null	166	3	1.80723
	20210621 TEFp mitoDHFRmCherry Far8 3GFP get1 get2 far9 far10 SDG24 N3
		Cell number (>100)	Cells with Far8-3xGFP on mitochondria ()	%
	KOY7805 WT	208	13	6.25
	KOY7807 get1-null	140	125	89.2857
	KOY7809 get2-null	142	135	95.0704
	KOY8036 far10-null	243	6	2.46914
	KOY8039 get1/far10-null	129	13	10.0775
	KOY8042 get2/far10-null	167	4	2.39521
	KOY8051 far9-null	246	0	0
	KOY8054 get1/far9-null	216	0	0
	KOY8057 get2/far9-null	112	0	0

## Sheet: FigS3D_N1-3
		N1	N2	N3	Average
	WT SDG24h	73.8911	88.6485	47.0751	69.8715
	WT SDG72h	100	100	100	100
	atg32-null SDG24h	80.729	59.6098	58.3309	66.2232
	atg32-null SDG72h	47.3615	41.5042	63.823	50.8962
	atg39/atg40-null SDG24h	54.5718	66.8231	72.9839	64.7929
	atg39/atg40-null SDG72h	43.1853	42.0133	55.3304	46.843
	atg32/atg39/atg40-null SDG24h	39.0303	51.0297	64.8232	51.6277
	atg32/atg39/atg40-null SDG72h	17.4842	26.2824	33.6791	25.8152

## Sheet: FigS3D_one-way ANOVA
	Table Analyzed	FigS3D_GFP processing
	Data sets analyzed	A-D
	ANOVA summary
	F	46.57
	P value	<0.0001
	P value summary	****
	Significant diff. among means (P < 0.05)?	Yes
	R squared	0.9458
	Brown-Forsythe test
	F (DFn, DFd)	0.8643 (3, 8)
	P value	0.4981
	P value summary	ns
	Are SDs significantly different (P < 0.05)?	No
	Bartlett's test
	Bartlett's statistic (corrected)
	P value
	P value summary
	Are SDs significantly different (P < 0.05)?
	ANOVA table	SS	DF	MS	F (DFn, DFd)	P value
	Treatment (between columns)	8871	3	2957	F (3, 8) = 46.57	P<0.0001
	Residual (within columns)	508	8	63.5
	Total	9379	11
	Data summary
	Number of treatments (columns)	4
	Number of values (total)	12

## Sheet: FigS3D_Dunnett
	Number of families	1
	Number of comparisons per family	6
	Alpha	0.05
	Tukey's multiple comparisons test	Mean Diff.	95.00% CI of diff.	Below threshold?	Summary	Adjusted P Value
	WT vs. atg32-null	49.1	28.27 to 69.94	Yes	***	0.0003	A-B
	WT vs. atg39/atg40-null	53.16	32.32 to 73.99	Yes	***	0.0002	A-C
	WT vs. atg32/atg39/atg40-null	74.18	53.35 to 95.02	Yes	****	<0.0001	A-D
	atg32-null vs. atg39/atg40-null	4.053	-16.78 to 24.89	No	ns	0.9218	B-C
	atg32-null vs. atg32/atg39/atg40-null	25.08	4.245 to 45.92	Yes	*	0.0203	B-D
	atg39/atg40-null vs. atg32/atg39/atg40-null	21.03	0.1917 to 41.86	Yes	*	0.048	C-D
	Test details	Mean 1	Mean 2	Mean Diff.	SE of diff.	n1	n2	q	DF
	Column A vs. Column B	100	50.9	49.1	6.506	3	3	10.67	8
	Column A vs. Column C	100	46.84	53.16	6.506	3	3	11.55	8
	Column A vs. Column D	100	25.82	74.18	6.506	3	3	16.12	8
	Column B vs. Column C	50.9	46.84	4.053	6.506	3	3	0.881	8
	Column B vs. Column D	50.9	25.82	25.08	6.506	3	3	5.451	8
	Column C vs. Column D	46.84	25.82	21.03	6.506	3	3	4.57	8
