# Supplementary material for: The GET pathway serves to activate Atg32-mediated mitophagy by ER targeting of the Ppg1-Far complex
Source: Life Sci Alliance. 2023 Jan 25;6(4):e202201640. doi: 10.26508/lsa.202201640 (PMC9880027; doi:10.26508/lsa.202201640)
Supplement: Supplementary file 13 [file LSA-2022-01640_SdataF4.1.xlsx]

## Sheet: Fig4A_N1-N3
	Lumi/GFP	N1	N2	N3	Avegrage
	WT	0.051582	0.0465871	0.0500966	0.0494219
	far9 null	0.166924	0.141113	0.135179	0.147739
	get1 null	0.0176082	0.00190913	0.0065716	0.00869632
	get1 far9 null	0.0565601	0.0438318	0.0698327	0.0567415
	get2 null	0.0177197	0.00182694	0.0103569	0.00996784
	get2 far9 null	0.0645866	0.0674411	0.0842626	0.0720968
	NC	0.00297619	0	0.00697598	0.00331739
Ctrl normalized	Lumi/GFP	N1	N2	N3
	WT	1	1	1
	far9 null	3.2361	3.02902	2.69836
	get1 null	0.341364	0.0409798	0.131179
	get1 far9 null	1.09651	0.940855	1.39396
	get2 null	0.343524	0.0392156	0.206739
	get2 far9 null	1.25211	1.44763	1.682
	NC	0.0576982	0	0.139251

## Sheet: Fig4A_t-test
	Table Analyzed	Fig4A_NanoBiT
	Column B	WT	get1-null	get2-null
	vs.	vs.	vs.	vs.
	Column A	far9-null	get1/far9-null	get2/far9-null
	Unpaired t test
	P value	0.0002	0.0037	0.0011
	P value summary	***	**	**
	Significantly different (P < 0.05)?	Yes	Yes	Yes
	One- or two-tailed P value?	Two-tailed	Two-tailed	Two-tailed
	t, df	t=12.69, df=4	t=6.080, df=4	t=8.302, df=4
	How big is the difference?
	Mean of column A	1	0.1712	0.1965
	Mean of column B	2.988	1.144	1.461
	Difference between means (B - A) ± SEM	1.988 ± 0.1566	0.9726 ± 0.1600	1.264 ± 0.1523
	95% confidence interval	1.553 to 2.423	0.5285 to 1.417	0.8413 to 1.687
	R squared (eta squared)	0.9758	0.9024	0.9451
	F test to compare variances
	F, DFn, Dfd	Infinity, 2, 2	2.231, 2, 2	1.994, 2, 2
	P value	<0.0001	0.619	0.6679
	P value summary	****	ns	ns
	Significantly different (P < 0.05)?	Yes	No	No
	Data analyzed
	Sample size, column A	3	3	3
	Sample size, column B	3	3	3

## Sheet: Fig4C_N1-N3
		N1	N2	N3	Average
	WT SDG24h	1.28388	2.20633	0.258176	1.24946
	WT SDG72h	100	100	100	100
	far9-null SDG24h	10.8475	11.376	10.0226	10.7487
	far9-null SDG72h	132.295	144.351	141.069	139.239
	get1-null SDG24h	1.96662	4.71574	0.797372	2.49325
	get1-null SDG72h	29.0006	31.1232	46.2101	35.4446
	get1/far9-null SDG24h	2.98487	6.04534	1.64946	3.55989
	get1/far9-null SDG72h	105.104	89.1869	87.7418	94.0111
	get2-null SDG24h	2.69533	3.27284	0	1.98939
	get2-null SDG72h	44.9018	45.8603	44.1776	44.9799
	get2/far9-null SDG24h	2.1735	6.00219	1.6864	3.28736
	get2/far9-null SDG72h	72.6463	78.4094	75.7979	75.6179
	atg32-null SDG24h	0.80137	2.90925	0	1.23687
	atg32-null SDG72h	0	3.29227	0.39087	1.22771

## Sheet: Fig4C_t-test
	Table Analyzed	Fig4C_mitophagy
	Column B	WT	get1-null	get2-null
	vs.	vs.	vs.	vs.
	Column A	far9-null	get1/far9-null	get2/far9-null
	Unpaired t test
	P value	0.0004	0.0017	<0.0001
	P value summary	***	**	****
	Significantly different (P < 0.05)?	Yes	Yes	Yes
	One- or two-tailed P value?	Two-tailed	Two-tailed	Two-tailed
	t, df	t=10.90, df=4	t=7.543, df=4	t=17.65, df=4
	How big is the difference?
	Mean of column A	100	35.44	44.98
	Mean of column B	139.2	94.01	75.62
	Difference between means (B - A) ± SEM	39.24 ± 3.599	58.57 ± 7.765	30.64 ± 1.736
	95% confidence interval	29.25 to 49.23	37.01 to 80.12	25.82 to 35.46
	R squared (eta squared)	0.9675	0.9343	0.9873
	F test to compare variances
	F, DFn, Dfd	Infinity, 2, 2	1.054, 2, 2	11.69, 2, 2
	P value	<0.0001	0.9736	0.1576
	P value summary	****	ns	ns
	Significantly different (P < 0.05)?	Yes	No	No
	Data analyzed
	Sample size, column A	3	3	3
	Sample size, column B	3	3	3
