# Supplementary material for: The GET pathway serves to activate Atg32-mediated mitophagy by ER targeting of the Ppg1-Far complex
Source: Life Sci Alliance. 2023 Jan 25;6(4):e202201640. doi: 10.26508/lsa.202201640 (PMC9880027; doi:10.26508/lsa.202201640)
Supplement: Supplementary file 15 [file LSA-2022-01640_SdataFS4.1.xlsx]

## Sheet: FigS4A_N1-3
	Lumi/GFP	N1	N2	N3	Average
	WT	0.0652647	0.0684666	0.0604501	0.0647271
	far10 null	0.100486	0.0622277	0.0756743	0.0794626
	get1 null	0.00851932	0.0054987	0.010289	0.00810235
	get1 far10 null	0.0385012	0.0521758	0.0456334	0.0454368
	get2 null	0.00453302	0.00240054	0.0053902	0.00410792
	get2 far10 null	0.0246761	0.0214167	0.0379372	0.02801
	NC	0	0	0.00336902	0.00112301
	Ctrl_normalized
	Lumi/GFP	N1	N2	N3
	WT	1	1	1
	far10 null	1.53967	0.908877	1.25185
	get1 null	0.130535	0.0803122	0.170207
	get1 far10 null	0.589924	0.762062	0.754893
	get2 null	0.0694559	0.0350616	0.0891677
	get2 far10 null	0.378092	0.312805	0.627578
	NC	0	0	0.0557321

## Sheet: FigS4A_t-test
	Table Analyzed	FigS4A_NanoBiT
	Column B	WT	get1-null	get2-null
	vs.	vs.	vs.	vs.
	Column A	far10-null	get1/far10-null	get2/far10-null
	Unpaired t test
	P value	0.2696	0.0007	0.0182
	P value summary	ns	***	*
	Significantly different (P < 0.05)?	No	Yes	Yes
	One- or two-tailed P value?	Two-tailed	Two-tailed	Two-tailed
	t, df	t=1.280, df=4	t=9.286, df=4	t=3.857, df=4
	How big is the difference?
	Mean of column A	1	0.127	0.06456
	Mean of column B	1.233	0.7023	0.4395
	Difference between means (B - A) ± SEM	0.2335 ± 0.1823	0.5753 ± 0.06195	0.3749 ± 0.09721
	95% confidence interval	-0.2728 to 0.7397	0.4033 to 0.7473	0.1050 to 0.6448
	R squared (eta squared)	0.2907	0.9557	0.7881
	F test to compare variances
	F, DFn, Dfd	Infinity, 2, 2	4.672, 2, 2	36.81, 2, 2
	P value	<0.0001	0.3526	0.0529
	P value summary	****	ns	ns
	Significantly different (P < 0.05)?	Yes	No	No
	Data analyzed
	Sample size, column A	3	3	3
	Sample size, column B	3	3	3

## Sheet: FigS4C_N1-6
		N1	N2	N3	N4	N5	N6	Average
	WT SDG24h	1.07456	7.03218	0.648666	4.01762	1.66609	1.99823	2.73956
	WT SDG72h	100	100	100	100	100	100	100
	far10-null SDG24h	2.01397	8.18868	2.5823	6.61531	5.68257	7.10265	5.36425
	far10-null SDG72h	109.045	115.281	83.9284	98.4527	101.42	87.7883	99.3192
	get1-null SDG24h	0.734337	7.07527	1.87306	1.63809	1.69661	1.44568	2.41051
	get1-null SDG72h	22.0281	28.1806	19.8498	39.8616	38.5865	30.081	29.7646
	get1/far10-null SDG24h	2.66395	3.40081	2.30992	5.73086	4.16429	2.7262	3.49934
	get1/far10-null SDG72h	109.489	124.52	81.8393	87.8356	85.4118	84.769	95.6442
	get2-null SDG24h	1.30015	0	2.724	1.74562	1.67729	1.57742	1.50408
	get2-null SDG72h	24.101	28.6183	29.5843	35.3883	35.1984	38.5557	31.9077
	get2/far10-null SDG24h	1.2083	2.81106	2.34649	1.82955	1.60953	1.45019	1.87585
	get2/far10-null SDG72h	56.7811	85.4861	47.8455	77.9316	68.1525	75.4473	68.6074
	atg32-null SDG24h	0.465891	0.858576	2.67726	0.954033	0.781289	1.13285	1.14498
	atg32-null SDG72h	0	0	4.21623	0.63985	0	0.137518	0.832267
		N1	N2	N3	N4	N5	N6
	WT SDG72h	100	100	100	100	100	100
	far10-null SDG72h	109.045	115.281	83.9284	98.4527	101.42	87.7883
	get1-null SDG72h	22.0281	28.1806	19.8498	39.8616	38.5865	30.081
	get1/far10-null SDG72h	109.489	124.52	81.8393	87.8356	85.4118	84.769
	get2-null SDG72h	24.101	28.6183	29.5843	35.3883	35.1984	38.5557
	get2/far10-null SDG72h	56.7811	85.4861	47.8455	77.9316	68.1525	75.4473
	atg32-null SDG72h	0	0	4.21623	0.63985	0	0.137518

## Sheet: FigS4C_t-test
	Table Analyzed	FigS4C_mitophagy
	Column B	WT	get1-null	get2-null
	vs.	vs.	vs.	vs.
	Column A	far10-null	get1/far10-null	get2/far10-null
	Unpaired t test
	P value	0.8925	<0.0001	0.0001
	P value summary	ns	****	***
	Significantly different (P < 0.05)?	No	Yes	Yes
	One- or two-tailed P value?	Two-tailed	Two-tailed	Two-tailed
	t, df	t=0.1386, df=10	t=8.411, df=10	t=5.969, df=10
	How big is the difference?
	Mean of column A	100	29.76	31.91
	Mean of column B	99.32	95.64	68.61
	Difference between means (B - A) ± SEM	-0.6809 ± 4.914	65.88 ± 7.833	36.70 ± 6.148
	95% confidence interval	-11.63 to 10.27	48.43 to 83.33	23.00 to 50.40
	R squared (eta squared)	0.001916	0.8761	0.7808
	F test to compare variances
	F, DFn, Dfd	Infinity, 5, 5	4.405, 5, 5	6.859, 5, 5
	P value	<0.0001	0.1294	0.0544
	P value summary	****	ns	ns
	Significantly different (P < 0.05)?	Yes	No	No
	Data analyzed
	Sample size, column A	6	6	6
	Sample size, column B	6	6	6
