# Supplementary material for: The GET pathway serves to activate Atg32-mediated mitophagy by ER targeting of the Ppg1-Far complex
Source: Life Sci Alliance. 2023 Jan 25;6(4):e202201640. doi: 10.26508/lsa.202201640 (PMC9880027; doi:10.26508/lsa.202201640)
Supplement: Supplementary file 20 [file LSA-2022-01640_SdataFS5.2.xlsx]

## Sheet: FigS5B_N1-3
N1	20200713 TEFpmitoDHFRmCHerry Far8 3GFP Far9-Sec12 TM get1 get2 N1 SDG24
		Sample	Cell number (>100)	Cells with Far8-3xGFP on the ER	Cells with Far8-3xGFP on mitochondria	%		N1	N2	N3
	KOY8077_SDG24_TEFp-mitoDHFRmCherry, Far8-3GFP	Overlay_Image_CH1_2	314	239	28	8.9172		8.9172	11.8644	6.56566
	KOY8179_SDG24_TEFp-mitoDHFRmCherry, Far8-3GFP, Far9-Sec12 TM	Overlay_Image_CH1_2	354	328	12	3.38983		3.38983	6.62651	5.32544
	KOY8079_SDG24_TEFp-mitoDHFRmCherry, Far8-3GFP, get1-null	Overlay_Image_CH1_2	144	24	138	95.8333		95.8333	98.6726	96.8553
	KOY8181_SDG24_TEFp-mitoDHFRmCherry, Far8-3GFP, get1-null, Far9-Sec12 TM	Overlay_Image_CH1_2	193	94	9	4.66321		4.66321	2.53165	2.31959
	KOY8081_SDG24_TEFp-mitoDHFRmCherry, Far8-3GFP, get2-null	Overlay_Image_CH1_2	212	46	208	98.1132		98.1132	96.6418	98.9726
	KOY8183_SDG24_TEFp-mitoDHFRmCherry, Far8-3GFP, get2-null, Far9-Sec12 TM	Overlay_Image_CH1_2	158	91	11	6.96203		6.96203	5.62249	2.9304
	KOY7853_SDG24_TEFp-mitoDHFRmCherry, Far8-3GFP, atg32-null	Overlay_Image_CH1_2	155	125
N2	20200713 TEFpmitoDHFRmCHerry Far8 3GFP Far9-Sec12 TM get1 get2 N2 SDG24
		Sample	Cell number (>100)	Cells with Far8-3xGFP on the ER		%
	KOY8077_SDG24_TEFp-mitoDHFRmCherry, Far8-3GFP	Overlay_Image_CH1_2	177	122	21	11.8644
	KOY8179_SDG24_TEFp-mitoDHFRmCherry, Far8-3GFP, Far9-Sec12 TM	Overlay_Image_CH1_2	166	144	11	6.62651
	KOY8079_SDG24_TEFp-mitoDHFRmCherry, Far8-3GFP, get1-null	Overlay_Image_CH1_2	226	29	223	98.6726
	KOY8181_SDG24_TEFp-mitoDHFRmCherry, Far8-3GFP, get1-null, Far9-Sec12 TM	Overlay_Image_CH1_2	316	156	8	2.53165
	KOY8081_SDG24_TEFp-mitoDHFRmCherry, Far8-3GFP, get2-null	Overlay_Image_CH1_2	268	44	259	96.6418
	KOY8183_SDG24_TEFp-mitoDHFRmCherry, Far8-3GFP, get2-null, Far9-Sec12 TM	Overlay_Image_CH1_2	249	108	14	5.62249
	KOY7853_SDG24_TEFp-mitoDHFRmCherry, Far8-3GFP, atg32-null	Overlay_Image_CH1_2	205	186
N3	20200713 TEFpmitoDHFRmCHerry Far8 3GFP Far9-Sec12 TM get1 get2 N3 SDG24
		Sample	Cell number (>100)	Cells with Far8-3xGFP on the ER		%
	KOY8077_SDG24_TEFp-mitoDHFRmCherry, Far8-3GFP	Overlay_Image_CH1_2	198	134	13	6.56566
	KOY8179_SDG24_TEFp-mitoDHFRmCherry, Far8-3GFP, Far9-Sec12 TM	Overlay_Image_CH1_2	169	147	9	5.32544
	KOY8079_SDG24_TEFp-mitoDHFRmCherry, Far8-3GFP, get1-null	Overlay_Image_CH1_2	159	21	154	96.8553
	KOY8181_SDG24_TEFp-mitoDHFRmCherry, Far8-3GFP, get1-null, Far9-Sec12 TM	Overlay_Image_CH1_2	388	162	9	2.31959
	KOY8081_SDG24_TEFp-mitoDHFRmCherry, Far8-3GFP, get2-null	Overlay_Image_CH1_2	292	46	289	98.9726
	KOY8183_SDG24_TEFp-mitoDHFRmCherry, Far8-3GFP, get2-null, Far9-Sec12 TM	Overlay_Image_CH1_2	273	121	8	2.9304
	KOY7853_SDG24_TEFp-mitoDHFRmCherry, Far8-3GFP, atg32-null	Overlay_Image_CH1_2	190	166

## Sheet: FigS5B_t-test
	Table Analyzed	FigS5B_microscope
	Column D	get1-null	get2-null
	vs.	vs.	vs.
	Column C	get1-nul, FAR9-TMer	get2-nul, FAR9-TMer
	Unpaired t test
	P value	<0.0001	<0.0001
	P value summary	****	****
	Significantly different (P < 0.05)?	Yes	Yes
	One- or two-tailed P value?	Two-tailed	Two-tailed
	t, df	t=84.05, df=4	t=67.84, df=4
	How big is the difference?
	Mean of column C	97.12	97.91
	Mean of column D	3.171	5.172
	Difference between means (D - C) ± SEM	-93.95 ± 1.118	-92.74 ± 1.367
	95% confidence interval	-97.05 to -90.85	-96.53 to -88.94
	R squared (eta squared)	0.9994	0.9991
	F test to compare variances
	F, DFn, Dfd	1.231, 2, 2	3.034, 2, 2
	P value	0.8965	0.4957
	P value summary	ns	ns
	Significantly different (P < 0.05)?	No	No
	Data analyzed
	Sample size, column C	3	3
	Sample size, column D	3	3
