# Supplementary material for: The GET pathway serves to activate Atg32-mediated mitophagy by ER targeting of the Ppg1-Far complex
Source: Life Sci Alliance. 2023 Jan 25;6(4):e202201640. doi: 10.26508/lsa.202201640 (PMC9880027; doi:10.26508/lsa.202201640)
Supplement: Supplementary file 22 [file LSA-2022-01640_SdataF6.2.xlsx]

## Sheet: Fig6B_N1-3
	N1	20201211 TEFpmitoDHFRmCherry Far8 3GFP get1 get2 FAR9 FAR10 GEM1 TA SDG24h N1 quantification
			Sample	Cell number (>100)	Cells with Far8-3xGFP on mitochondria ()	%		N1-3 Average	Stdev
		KOY8077_SDG24_1 TEFp-mitoDHFRmCherry, Far8-3GFP	Overlay_Image_CH1_2	163	22	13.4969		12.0454	2.5588
		KOY8079_SDG24_1 TEFp-mitoDHFRmCherry, Far8-3GFP, get1-null	Overlay_Image_CH1_2	104	99	95.1923		92.3317	3.58384
		KOY8081_SDG24_1 TEFp-mitoDHFRmCherry, Far8-3GFP, get2-null	Overlay_Image_CH1_2	263	228	86.692		86.0862	2.18389
		KOY8081_SDG24_1 TEFp-mitoDHFRmCherry, Far8-3GFP, FAR9 FAR10 Gem1 TA	Overlay_Image_CH1_2	255	249	97.6471		97.6372	1.85759
	N2	20201214 TEFpmitoDHFRmCherry Far8 3GFP get1 get2 FAR9 FAR10 GEM1 TA SDG24h N2 quantification
			Sample	Cell number (>100)	Cells with Far8-3xGFP on mitochondria ()	%
		KOY8077_SDG24_1 TEFp-mitoDHFRmCherry, Far8-3GFP	Overlay_Image_CH1_2	187	17	9.09091
		KOY8079_SDG24_1 TEFp-mitoDHFRmCherry, Far8-3GFP, get1-null	Overlay_Image_CH1_2	154	136	88.3117
		KOY8081_SDG24_1 TEFp-mitoDHFRmCherry, Far8-3GFP, get2-null	Overlay_Image_CH1_2	124	109	87.9032
		KOY8081_SDG24_1 TEFp-mitoDHFRmCherry, Far8-3GFP, FAR9 FAR10 Gem1 TA	Overlay_Image_CH1_2	196	195	99.4898
	N3	20201214 TEFpmitoDHFRmCherry Far8 3GFP get1 get2 FAR9 FAR10 GEM1 TA SDG24h N3 quantification
			Sample	Cell number (>100)	Cells with Far8-3xGFP on mitochondria ()	%
		KOY8077_SDG24_1 TEFp-mitoDHFRmCherry, Far8-3GFP	Overlay_Image_CH1_2	155	21	13.5484
		KOY8079_SDG24_1 TEFp-mitoDHFRmCherry, Far8-3GFP, get1-null	Overlay_Image_CH1_2	169	158	93.4911
		KOY8081_SDG24_1 TEFp-mitoDHFRmCherry, Far8-3GFP, get2-null	Overlay_Image_CH1_2	202	169	83.6634
		KOY8081_SDG24_1 TEFp-mitoDHFRmCherry, Far8-3GFP, FAR9 FAR10 Gem1 TA	Overlay_Image_CH1_2	142	136	95.7746

## Sheet: Fig6B_one-way ANOVA
	Table Analyzed	Fig6B_microscope
	Data sets analyzed	A-D
	ANOVA summary
	F	704.6
	P value	<0.0001
	P value summary	****
	Significant diff. among means (P < 0.05)?	Yes
	R squared	0.9962
	Brown-Forsythe test
	F (DFn, DFd)	0.1566 (3, 8)
	P value	0.9225
	P value summary	ns
	Are SDs significantly different (P < 0.05)?	No
	Bartlett's test
	Bartlett's statistic (corrected)
	P value
	P value summary
	Are SDs significantly different (P < 0.05)?
	ANOVA table	SS	DF	MS	F (DFn, DFd)	P value
	Treatment (between columns)	14591	3	4864	F (3, 8) = 704.6	P<0.0001
	Residual (within columns)	55.22	8	6.903
	Total	14646	11
	Data summary
	Number of treatments (columns)	4
	Number of values (total)	12

## Sheet: Fig6B_Dunnett
	Number of families	1
	Number of comparisons per family	3
	Alpha	0.05
	Dunnett's multiple comparisons test	Mean Diff.	95.00% CI of diff.	Below threshold?	Summary	Adjusted P Value	A-?
	WT vs. get1-null	-80.29	-86.46 to -74.11	Yes	****	<0.0001	B
	WT vs. get2-null	-74.04	-80.22 to -67.86	Yes	****	<0.0001	C
	WT vs. FAR9/FAR10-TAmito	-85.59	-91.77 to -79.41	Yes	****	<0.0001	D
	Test details	Mean 1	Mean 2	Mean Diff.	SE of diff.	n1	n2	q	DF
	Column A vs. Column B	12.05	92.33	-80.29	2.145	3	3	37.43	8
	Column A vs. Column C	12.05	86.09	-74.04	2.145	3	3	34.51	8
	Column A vs. Column D	12.05	97.64	-85.59	2.145	3	3	39.9	8

## Sheet: Fig6C_N1-11
		P.C.	Far9TM mito	Far10TM mito	Far9/10 TM mito	N.C.			P.C.	Far9TM mito	Far10TM mito	Far9/10 TM mito	N.C.
	KOY	6996	10593	10660	10662	1387			6996	10593	10660	10662	1387
	GFP							Luminescence
n=1		0.152163	0.184962	0.199812	0.128407	0.109283		n=1	0.0114024	0.00664958	0.00509965	0.00415999	0.000581749
n=2		0.152768	0.14122	0.140756	0.158612	0.111545		n=2	0.00538189	0.00474695	0.00176075	0.00142409	8.71422e-05
n=3		0.137398	0.130111	0.158068	0.147534	0.0965505		n=3	0.0075	0.0049	0.0043	0.0045	0
n=4		0.133926	0.157292	0.154408	0.155101	0.0842372		n=4	0.00815096	0.00592615	0.00502368	0.0048186	0.000778775
n=5		0.168949	0.15507	0.162597	0.151206	0.127843		n=5	0.0058481	0.00604571	0.00310889	0.00207977	0
n=6		0.165342	0.167505	0.161688	0.200964	0.138782		n=6	0.00809392	0.00612783	0.00559954	0.00495581	0
n=7		0.16162	0.164054	0.166782	0.185679	0.134982		n=7	0.0139803	0.0101323	0.0102371	0.00869746	0
n=8		0.185095	0.18166	0.177664	0.205676	0.14469		n=8	0.00313355	0.0036681	0.00279239	0.00154613	0
n=9		0.160997	0.158997	0.170053	0.200526	0.140008		n=9	0.0091364	0.00749426	0.00554805	0.00379728	0
n=10		0.163835	0.169235	0.167191	0.163505	0.117597		n=10	0.0103885	0.00779387	0.00800431	0.00654044	0.00101957
n=11		0.1667	0.153072	0.164961	0.162015	0.126201		n=11	0.00951177	0.00921506	0.00560735	0.00649214	0.000462125
AVE		0.158981	0.160289	0.165816	0.169021	0.121065		AVE	0.00841163	0.00660907	0.00518925	0.00445561	0.000266305
	P.C.	Far9TM mito	Far10TM mito	Far9/10 TM mito	N.C.			P.C.	Far9TM mito	Far10TM mito	Far9/10 TM mito	N.C.
	6996	10593	10660	10662	1387			6996	10593	10660	10662	1387
Lumi/ GFP							% (KOY6996)
n=1	0.0749356	0.035951	0.0255222	0.0323968	0.00532331			100	47.9759	34.0589	43.2329	7.10385
n=2	0.0352291	0.0336138	0.0125092	0.00897844	0.000781229			100	95.4149	35.5082	25.4858	2.21756
n=3	0.0545859	0.03766	0.0272034	0.0305014	0			100	68.9922	49.8359	55.8778	0
n=4	0.0608617	0.037676	0.0325351	0.0310675	0.00924503			100	61.9044	53.4575	51.046	15.1902
n=5	0.0346146	0.0389869	0.0191202	0.0137546	0			100	112.631	55.2375	39.7363	0
n=6	0.0489525	0.036583	0.0346318	0.0246602	0			100	74.7316	70.7457	50.3758	0
n=7	0.0865013	0.0617617	0.0613801	0.0468414	0			100	71.3997	70.9586	54.1511	0
n=8	0.0169294	0.0201921	0.0157173	0.00751732	0			100	119.273	92.8402	44.404	0
n=9	0.0567489	0.0471346	0.0326254	0.0189366	0			100	83.0582	57.4909	33.3691	0
n=10	0.0634085	0.0460534	0.0478753	0.0400015	0.00866996			100	72.6298	75.5029	63.0853	13.6732
n=11	0.0570591	0.0602008	0.033992	0.0400713	0.00366182			100	105.506	59.5732	70.2276	6.41758
AVE	0.0536206	0.0395613	0.030912	0.0254656	0.00240195		AVE	100	83.047	59.5645	48.272	4.05476

## Sheet: Fig6C_t-test
	Table Analyzed	Fig6C_NanoBiT
	Column B	WT
	vs.	vs.
	Column A	FAR9/FAR10-TAmito
	Unpaired t test
	P value	<0.0001
	P value summary	****
	Significantly different (P < 0.05)?	Yes
	One- or two-tailed P value?	Two-tailed
	t, df	t=13.31, df=20
	How big is the difference?
	Mean of column A	1
	Mean of column B	0.4827
	Difference between means (B - A) ± SEM	-0.5173 ± 0.03885
	95% confidence interval	-0.5983 to -0.4362
	R squared (eta squared)	0.8986
	F test to compare variances
	F, DFn, Dfd	Infinity, 10, 10
	P value	<0.0001
	P value summary	****
	Significantly different (P < 0.05)?	Yes
	Data analyzed
	Sample size, column A	11
	Sample size, column B	11

## Sheet: Fig6E_N1-3
		N1	N2	N3	Average				N1	N2	N3
	WT SDG24h	0	0.570641	0.615896	0.395512			WT SDG 72h	100	100	100
	WT SDG 72h	100	100	100	100			get1 SDG72h	23.8346	17.9561	23.5021
	get1 SDG24h	0.0262263	0.582752	0.33716	0.31538			get2 SDG72h	30.4497	18.451	22.8625
	get1 SDG72h	23.8346	17.9561	23.5021	21.7643			FAR9/FAR10-TAmito SDG72h	70.3326	66.5397	75.2334
	get2 SDG24h	0	0.454245	0.160169	0.204805			atg32-null SDG72h	0.0617205	0.283896	0
	get2 SDG72h	30.4497	18.451	22.8625	23.9211
	FAR9/FAR10-TAmito SDG24h	0.152977	0.634341	0.612274	0.466531
	FAR9/FAR10-TAmito SDG72h	70.3326	66.5397	75.2334	70.7019
	atg32-null SDG24h	0	0.585375	0.482989	0.356121
	atg32-null SDG72h	0.0617205	0.283896	0	0.115205

## Sheet: Fig6E_one-way ANOVA
	Table Analyzed	Fig6E_mitophagy
	Data sets analyzed	A-E
	ANOVA summary
	F	374.7
	P value	<0.0001
	P value summary	****
	Significant diff. among means (P < 0.05)?	Yes
	R squared	0.9934
	Brown-Forsythe test
	F (DFn, DFd)	1.487 (4, 10)
	P value	0.2777
	P value summary	ns
	Are SDs significantly different (P < 0.05)?	No
	Bartlett's test
	Bartlett's statistic (corrected)
	P value
	P value summary
	Are SDs significantly different (P < 0.05)?
	ANOVA table	SS	DF	MS	F (DFn, DFd)	P value
	Treatment (between columns)	20010	4	5003	F (4, 10) = 374.7	P<0.0001
	Residual (within columns)	133.5	10	13.35
	Total	20144	14
	Data summary
	Number of treatments (columns)	5
	Number of values (total)	15

## Sheet: Fig6E_Dunnett
	Number of families	1
	Number of comparisons per family	4
	Alpha	0.05
	Dunnett's multiple comparisons test	Mean Diff.	95.00% CI of diff.	Below threshold?	Summary	Adjusted P Value	A-?
	WT vs. get1-null	78.24	69.61 to 86.86	Yes	****	<0.0001	B
	WT vs. get2-null	76.08	67.46 to 84.70	Yes	****	<0.0001	C
	WT vs. FAR9/FAR10-TAmito	29.3	20.67 to 37.92	Yes	****	<0.0001	D
	WT vs. atg32-null	99.88	91.26 to 108.5	Yes	****	<0.0001	E
	Test details	Mean 1	Mean 2	Mean Diff.	SE of diff.	n1	n2	q	DF
	Column A vs. Column B	100	21.76	78.24	2.983	3	3	26.22	10
	Column A vs. Column C	100	23.92	76.08	2.983	3	3	25.5	10
	Column A vs. Column D	100	70.7	29.3	2.983	3	3	9.82	10
	Column A vs. Column E	100	0.1152	99.88	2.983	3	3	33.48	10

## Sheet: Fig6G_N1-5
			Gly (h)	N = 1	N = 2	N = 3	N = 4	N = 5		AVE
	1387	Wild-type	24	0.129978	1.23123	0.708899	0.58566	0.519701		0.635094
			48	69.4844	62.7715	71.5492	67.812	57.8663		65.8967
			72	100	100	100	100	100		100
	6872	ppg1 KO	24	8.81918	6.23146	11.3339	4.53273	4.31969		7.04739
			48	102.218	104.227	120.272	110.798	93.7198		106.247
			72	125.877	151.378	158.856	151.378	142.427		145.983
	10733	FAR9/10-mito	24	1.51429	1.08965	1.6619	1.20397	1.00067		1.2941
			48	35.9404	28.2202	33.3199	35.9457	29.4763		32.5805
			72	64.0216	62.307	59.6662	53.8145	57.1288		59.3876
	10840	FAR9/10-mito ppg1 KO	24	10.1492	8.30019	11.4529	5.72003	4.79788		8.08405
			48	101.935	119.158	109.467	108.217	100.982		107.952
			72	132.306	178.797	159.065	177.044	157.915		161.025
	1422	atg32 KO	24	1.99616	0.94236	0.941939	0.859556	0.972349		1.14247
			48	0.826755	0.460646	0.452311	0.228007	0.443846		0.482313
			72	-0.377358	0.260098	0.461836	0.25699	0.367962		0.193906

## Sheet: Fig6G_one-way ANOVA
	Table Analyzed	Fig6G_mitophagy
	Data sets analyzed	A-D
	ANOVA summary
	F	79.69
	P value	<0.0001
	P value summary	****
	Significant diff. among means (P < 0.05)?	Yes
	R squared	0.9373
	Brown-Forsythe test
	F (DFn, DFd)	2.680 (3, 16)
	P value	0.0819
	P value summary	ns
	Are SDs significantly different (P < 0.05)?	No
	Bartlett's test
	Bartlett's statistic (corrected)
	P value
	P value summary
	Are SDs significantly different (P < 0.05)?
	ANOVA table	SS	DF	MS	F (DFn, DFd)	P value
	Treatment (between columns)	31857	3	10619	F (3, 16) = 79.69	P<0.0001
	Residual (within columns)	2132	16	133.3
	Total	33989	19
	Data summary
	Number of treatments (columns)	4
	Number of values (total)	20

[truncated: 1 more sheets: Fig6G_Tukey]
