# Supplementary material for: The GET pathway serves to activate Atg32-mediated mitophagy by ER targeting of the Ppg1-Far complex
Source: Life Sci Alliance. 2023 Jan 25;6(4):e202201640. doi: 10.26508/lsa.202201640 (PMC9880027; doi:10.26508/lsa.202201640)
Supplement: Supplementary file 24 [file LSA-2022-01640_SdataFS6.2.xlsx]

## Sheet: FigS6B_N1-3
		N1	N2	N3	Average				N1	N2	N3
	WT SDG24h	0.116133	0	0.171566	0.0958999			WT SDG72h	100	100	100
	WT SDG72h	100	100	100	100			PPG1 H111N SDG72h	167.469	135.485	132.864
	PPG1 H111N SDG24h	22.5795	11.8276	11.2355	15.2142			FAR9/FAR10-TAmito SDG72h	69.8614	71.1328	83.2351
	PPG1 H111N SDG72h	167.469	135.485	132.864	145.273			PPG1 H111N FAR9/FAR10-TAmito SDG72h	148.038	135.856	133.641
	FAR9/FAR10-TAmito SDG24h	0	0.607168	1.07462	0.560595			atg32-null SDG72h	2.02872	0	0.042309
	FAR9/FAR10-TAmito SDG72h	69.8614	71.1328	83.2351	74.7431
	PPG1 H111N FAR9/FAR10-TAmito SDG24h	15.3829	9.64837	14.2481	13.0931
	PPG1 H111N FAR9/FAR10-TAmito SDG72h	148.038	135.856	133.641	139.178
	atg32-null SDG24h	0	0.3816	0.706867	0.362822
	atg32-null SDG72h	2.02872	0	0.042309	0.690343

## Sheet: FigS6B_t-test
	Table Analyzed	FigS6B_mitophagy
	Column D	FAR9/FAR10-TAmito
	vs.	vs.
	Column C	PPG1 H111N FAR9/FAR10-Tamito
	Unpaired t test
	P value	0.0005
	P value summary	***
	Significantly different (P < 0.05)?	Yes
	One- or two-tailed P value?	Two-tailed
	t, df	t=10.43, df=4
	How big is the difference?
	Mean of column C	74.74
	Mean of column D	139.2
	Difference between means (D - C) ± SEM	64.44 ± 6.180
	95% confidence interval	47.28 to 81.59
	R squared (eta squared)	0.9645
	F test to compare variances
	F, DFn, Dfd	1.103, 2, 2
	P value	0.9511
	P value summary	ns
	Significantly different (P < 0.05)?	No
	Data analyzed
	Sample size, column C	3
	Sample size, column D	3

## Sheet: FigS6C_N1-3
	Strain	0	24_N1-3			24h average	st
	WT	0.01	3.195	3.71	3.125	3.34333	0.319466
	msp1ko	0.01	4.095	3.11	3.215	3.47333	0.540933
	get1ko	0.01	1.73	2.1115	2.465	2.10217	0.367589
	get1,msp1ko	0.01	0.51	0.435	0.645	0.53	0.106419
	get2ko	0.01	0.87	0.67	0.855	0.798333	0.111393
	get2,msp1ko	0.01	0.84	1.2	0.76	0.933333	0.234379
	get3ko	0.01	2.975	2.9	3.605	3.16	0.387201
	get3,msp1ko	0.01	0.34	0.845	0.48	0.555	0.26072
			48_N1-3			48h average	st
	WT		4.855	4.98	5.525	5.12	0.356265
	msp1ko		5.23	5.045	5.345	5.20667	0.151355
	get1ko		3.245	2.805	2.795	2.94833	0.25697
	get1,msp1ko		1.65	1.315	1.235	1.4	0.22017
	get2ko		4.385	3.515	3.475	3.79167	0.514231
	get2,msp1ko		1.585	2.53	2.76	2.29167	0.622702
	get3ko		4.24	4.955	4.78	4.65833	0.372704
	get3,msp1ko		2.325	3	2.665	2.66333	0.337503
			72_N1-3			72h average	st
	WT		5.505	5.73	6.62	5.95167	0.589626
	msp1ko		6.21	6.11	6.08	6.13333	0.0680686
	get1ko		3.32	3.025	3.095	3.14667	0.154137
	get1,msp1ko		1.865	1.535	1.255	1.55167	0.305341
	get2ko		5.24	4.17	4.35	4.58667	0.572917
	get2,msp1ko		1.92	3.19	3.28	2.79667	0.760548
	get3ko		4.205	5.99	5.925	5.37333	1.01233
	get3,msp1ko		2.96	3.255	3.57	3.26167	0.305055

## Sheet: FigS6E_N1-3
		N1	N2	N3	Average
	WT SDG24h	0.0839293	1.97799	2.56537	1.54243
	WT SDG72h	100	100	100	100
	d151-200 SDG24h	8.82433	8.07497	10.2884	9.06255
	d151-200 SDG72h	135.698	153.498	134.089	141.095
	msp1-null SDG24h	1.35879	5.1288	3.08169	3.18976
	msp1-null SDG72h	70.0303	74.1513	72.5586	72.2467
	msp1-null d151-200 SDG24h	6.90144	9.34429	9.43456	8.5601
	msp1-null d151-200 SDG72h	120.76	100.96	124.762	115.494
	get3-null SDG24h	1.1614	4.7307	2.86725	2.91978
	get3-null SDG72h	80.3783	71.2101	81.898	77.8288
	get3-null d151-200 SDG24h	6.2784	6.56986	6.37079	6.40635
	get3-null d151-200 SDG72h	133.793	159.326	137.25	143.456
	msp1/get3-null SDG24h	0	4.16411	1.15555	1.77322
	msp1/get3-null SDG72h	12.3686	16.0572	14.3464	14.2574
	msp1/get3-null d151-200 SDG24h	0.163055	3.50029	1.1556	1.60632
	msp1/get3-null d151-200 SDG72h	45.6469	69.7841	63.4472	59.6261
	atg32-null SDG24h	0	3.04214	0.260225	1.10079
	atg32-null SDG72h	0.0265065	0.545018	0.0767019	0.216075

## Sheet: FigS6E_t-test
	Table Analyzed	FigS6E_mitophagy
	Column H	msp1/get3-null
	vs.	vs.
	Column G	msp1/get3-null d151-200
	Unpaired t test
	P value	0.0034
	P value summary	**
	Significantly different (P < 0.05)?	Yes
	One- or two-tailed P value?	Two-tailed
	t, df	t=6.212, df=4
	How big is the difference?
	Mean of column G	14.26
	Mean of column H	59.63
	Difference between means (H - G) ± SEM	45.37 ± 7.303
	95% confidence interval	25.09 to 65.65
	R squared (eta squared)	0.9061
	F test to compare variances
	F, DFn, Dfd	45.96, 2, 2
	P value	0.0426
	P value summary	*
	Significantly different (P < 0.05)?	Yes
	Data analyzed
	Sample size, column G	3
	Sample size, column H	3
