# Supplementary material for: The GET pathway serves to activate Atg32-mediated mitophagy by ER targeting of the Ppg1-Far complex
Source: Life Sci Alliance. 2023 Jan 25;6(4):e202201640. doi: 10.26508/lsa.202201640 (PMC9880027; doi:10.26508/lsa.202201640)
Supplement: Supplementary file 28 [file LSA-2022-01640_TableS2.xlsx]

## Sheet: Sheet1
Table S2. Plasmid used in this study
KOB number	Name	Relevant characteristics
KOB71	pRS316-ATG32-3HA	CEN URA3 580 bp 5'-UTR & 744 bp 3'-UTR from ATG32
